# Supplementary material
Source: ML conference proceedings conference paper supplement (https://openaccess.thecvf.com/content/CVPR_2020/html/Tan_Self-Supervised_Human_Depth_CVPR_2020_paper.html)
Supplement: Supplementary file 1 [file Tan_Self-Supervised_Human_Depth_CVPR_2020_supplemental.zip]

Archive with 2 entries (2 files):
- 04998-supp.pdf
- 04998-supp.m4v
